# Supplementary material for: Synthesis and Characterization of Highly Crystalline Bi-Functional Mn-Doped Zn2SiO4 Nanostructures by Low-Cost Sol–Gel Process
Source: Nanomaterials (Basel). 2023 Jan 29;13(3):538. doi: 10.3390/nano13030538 (PMC9921793; doi:10.3390/nano13030538)
Supplement: Supplementary file 1 [file nanomaterials-13-00538-s001.zip › nanomaterials-2044708-supplementary.pdf]

*Supplementary Materials*

# **Synthesis and Characterization of Highly Crystalline Bi-Functional Mn-Doped Zn<sub>2</sub>SiO<sub>4</sub> Nanostructures by Low-Cost Sol–Gel Process**

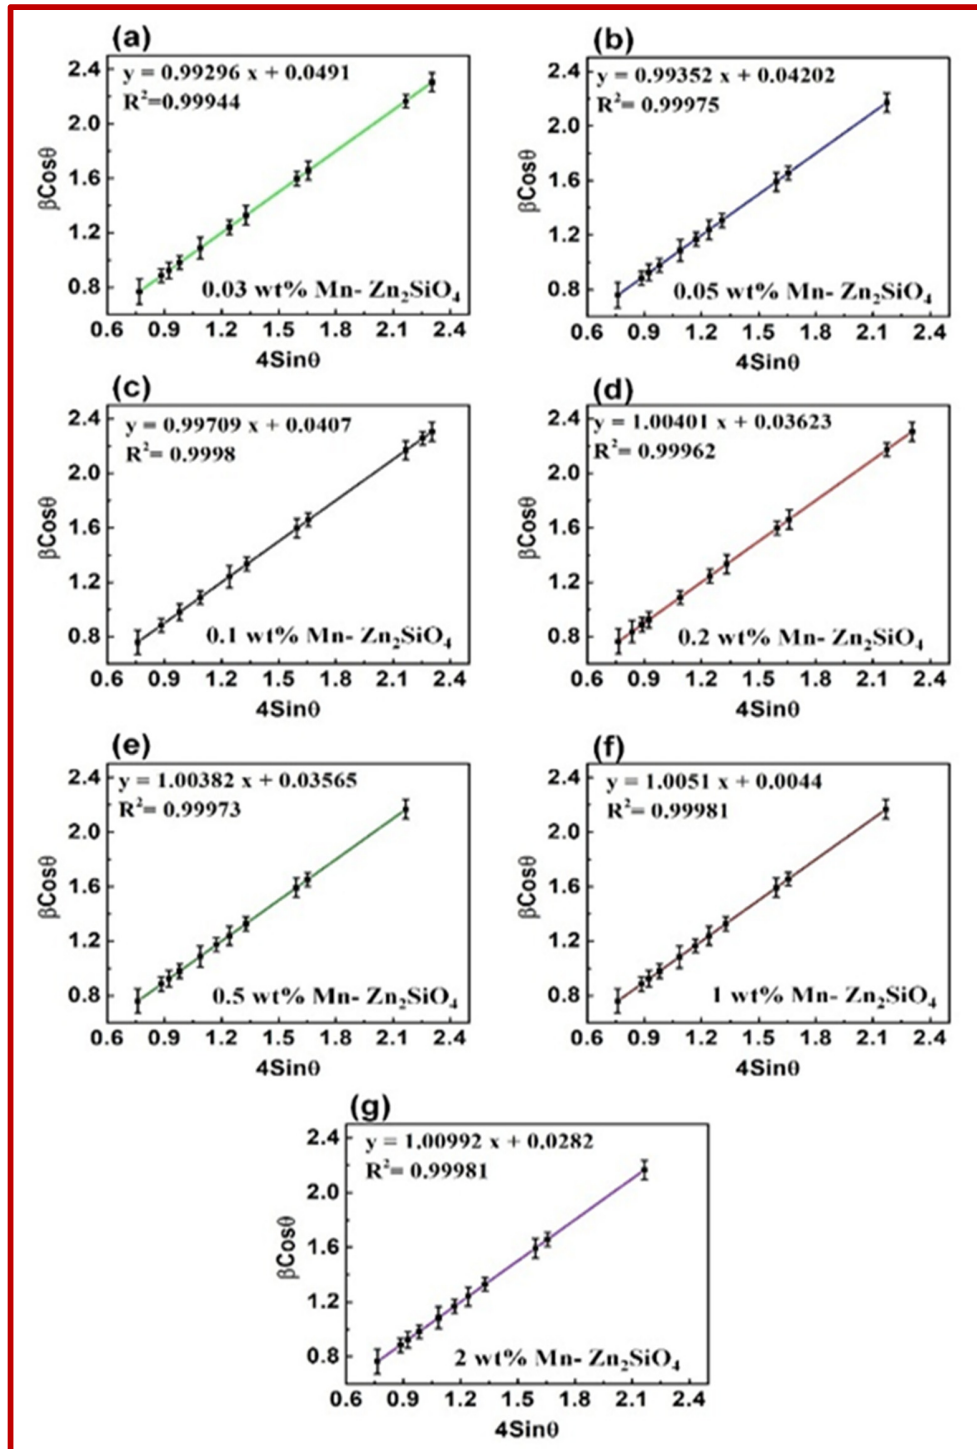

Figure S1(a-g) shows the graphs between  $\beta \cos \theta_B$  and  $\sin \theta_B$ .

Fig. S1 shows the calculated strain and crystalline size of different concentration of Mn doped  $\text{Zn}_2\text{SiO}_4$ . It is clearly observed that strain is increases as Mn doping concentration

increase in the host lattice. The obtained results indicate that crystallite size increases due to ionic radius differences between  $\text{Mn}^{2+}$  and  $\text{Zn}^{2+}$  (the ionic radius of Zn and Mn are 0.083 and 0.091 nm, respectively). I am assuming these graphs correspond to different Mn doping concentrations. This needs to be indicated in the figure description and can also be added as legend in each of the sub-figures.

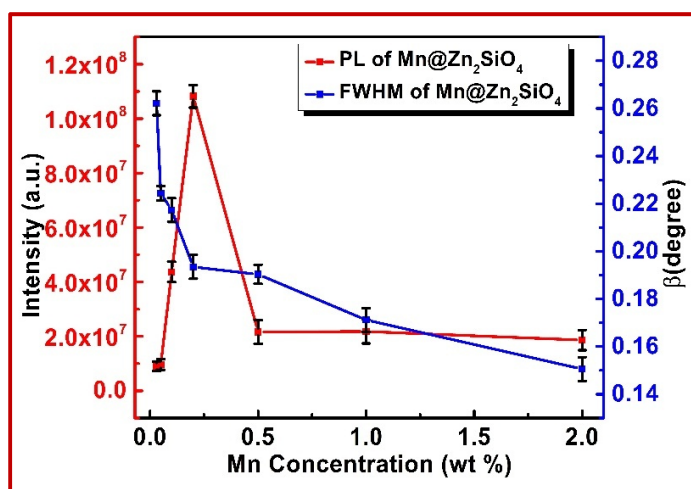

**Figure S2.** Comparative strain and crystallite size of  $\text{Zn}_2\text{SiO}_4$  as a function of Mn doping in  $\text{Zn}_2\text{SiO}_4$  host lattice.

**Table S1.** Effect of Mn doping on the FWHM, strain and crystallites Size of Zn<sub>2</sub>SiO<sub>4</sub> nanostructure

| Sr. No. | Mn (wt %) | FWHM<br>$\beta$ (degree) | Strain  | Crystallites Size |
|---------|-----------|--------------------------|---------|-------------------|
| 1       | 0.03      | 0.262153801              | 0.99296 | 30.5499           |
| 2       | 0.05      | 0.224352455              | 0.99352 | 35.69728          |
| 3       | 0.1       | 0.217304673              | 0.99709 | 36.85504          |
| 4       | 0.2       | 0.193438563              | 1.00401 | 41.40215          |
| 5       | 0.5       | 0.190341808              | 1.00382 | 42.07574          |
| 6       | 1         | 0.171174176              | 1.0051  | 46.78727          |
| 7       | 2         | 0.15056492               | 1.00992 | 53.19149          |

<https://drive.google.com/file/d/1NCbA7lG8Hl9pZz00pj-5YOExEVstGZdh/view?usp=sharing>

**Video S1:** The demonstration at 0.4 wt% Mn doped Zn<sub>2</sub>SiO<sub>4</sub>
